# Supplementary material
Source: publisher figshare collection journal article supplement (https://sage.figshare.com/ndownloader/files/16257275)
Supplement: Supplementary file 1 [file 16257275]

## Supplementary File

iPad 1:30 pm 91%  
msreactor.com

### Acceptability Questionnaire

These questions aim to get your feedback on the test you have just completed.  
Note: for touch devices, please tap the scale rather than try to drag the slider handle!

**1. How do you feel about the duration of the test?**

Too long About right Too short

**2. How interesting did you find the test?**

Very interesting About right Very boring

**3. Would you be happy if you were asked to do it again?**

Very unhappy About right Very happy

**4. Did it make you feel anxious?**

Not anxious at all About right Very anxious

**5. Did you enjoy doing the test?**

Not at all About right Very much indeed

Submit

Thank you!

Acceptability survey completed by participants following clinic-based tests.

1:30 pm msreactor.com

## MusiQoL Questionnaire

Note: for touch devices, please tap the scale rather than try to drag the slider handle!

For each question, check the response that is closest to your feelings:

Due to your MS, during the past 4 weeks, have you...

|                                                                                                     | Never<br>Not at all      | Rarely<br>A little       | Sometimes<br>Somewhat    | Often<br>A lot           | Always<br>Very much      | Not<br>applicable        |
|-----------------------------------------------------------------------------------------------------|--------------------------|--------------------------|--------------------------|--------------------------|--------------------------|--------------------------|
| 1. Had difficulty walking or moving outside?                                                        | <input type="checkbox"/> |
| 2. Had difficulty with outdoor activities: i.e. shopping, going out to a movie...?                  | <input type="checkbox"/> |
| 3. Had difficulty walking around home?                                                              | <input type="checkbox"/> |
| 4. Been troubled by your balance or walking problems?                                               | <input type="checkbox"/> |
| 5. Had difficulty with leisure activities at home: i.e. do-it-yourself, gardening...?               | <input type="checkbox"/> |
| 6. Had difficulty with your occupational activities: i.e. integration, interruption, limitation...? | <input type="checkbox"/> |
| 7. Been quickly tired?                                                                              | <input type="checkbox"/> |
| 8. Been short of energy?                                                                            | <input type="checkbox"/> |

1:31 pm msreactor.com

|                                                            |                          |                          |                          |                          |                          |                          |
|------------------------------------------------------------|--------------------------|--------------------------|--------------------------|--------------------------|--------------------------|--------------------------|
| 20. Talked with your spouse/partner or your family?        | <input type="checkbox"/> |
| 21. Felt understood by your spouse/partner or your family? | <input type="checkbox"/> |
| 22. Felt encouraged by your spouse/partner or your family? | <input type="checkbox"/> |
| 23. Felt satisfied with your love life?                    | <input type="checkbox"/> |
| 24. Felt satisfied with your sex life?                     | <input type="checkbox"/> |

Due to your MS, during the past 4 weeks, have you...

|                                                                                                                                                 | Never<br>Not at all      | Rarely<br>A little       | Sometimes<br>Somewhat    | Often<br>A lot           | Always<br>Very much      | Not<br>applicable        |
|-------------------------------------------------------------------------------------------------------------------------------------------------|--------------------------|--------------------------|--------------------------|--------------------------|--------------------------|--------------------------|
| 25. Felt that your situation is unfair?                                                                                                         | <input type="checkbox"/> |
| 26. Felt bitter?                                                                                                                                | <input type="checkbox"/> |
| 27. Been upset by the stares of other people?                                                                                                   | <input type="checkbox"/> |
| 28. Been embarrassed when in public?                                                                                                            | <input type="checkbox"/> |
| 29. Been satisfied with the information on your disease or the treatment given by the doctors, nurses, psychologists... taking care of your MS? | <input type="checkbox"/> |
| 30. Felt understood by the doctors, nurses, psychologists... taking care of your MS?                                                            | <input type="checkbox"/> |
| 31. Been satisfied with your treatments?                                                                                                        | <input type="checkbox"/> |

1:30 pm msreactor.com

Due to your MS, during the past 4 weeks, have you...

|                                                                                               | Never<br>Not at all      | Rarely<br>A little       | Sometimes<br>Somewhat    | Often<br>A lot           | Always<br>Very much      | Not<br>applicable        |
|-----------------------------------------------------------------------------------------------|--------------------------|--------------------------|--------------------------|--------------------------|--------------------------|--------------------------|
| 9. Felt anxious?                                                                              | <input type="checkbox"/> |
| 10. Felt depressed or gloomy?                                                                 | <input type="checkbox"/> |
| 11. Felt like crying?                                                                         | <input type="checkbox"/> |
| 12. Felt nervous or irritated by a few things or situations?                                  | <input type="checkbox"/> |
| 13. Been troubled by loss of memory?                                                          | <input type="checkbox"/> |
| 14. Had difficulty concentrating: i.e. when reading, watching a film, following a discussion? | <input type="checkbox"/> |
| 15. Been troubled by your vision: worsened or unpleasant?                                     | <input type="checkbox"/> |
| 16. Experienced unpleasant feelings: i.e. hot, cold...?                                       | <input type="checkbox"/> |

Due to your MS, during the past 4 weeks, have you...

|                                      | Never<br>Not at all      | Rarely<br>A little       | Sometimes<br>Somewhat    | Often<br>A lot           | Always<br>Very much      | Not<br>applicable        |
|--------------------------------------|--------------------------|--------------------------|--------------------------|--------------------------|--------------------------|--------------------------|
| 17. Talked with your friends?        | <input type="checkbox"/> |
| 18. Felt understood by your friends? | <input type="checkbox"/> |
| 19. Felt encouraged by your friends? | <input type="checkbox"/> |

1:31 pm msreactor.com

|                                                            |                          |                          |                          |                          |                          |                          |
|------------------------------------------------------------|--------------------------|--------------------------|--------------------------|--------------------------|--------------------------|--------------------------|
| 22. Felt encouraged by your spouse/partner or your family? | <input type="checkbox"/> |
| 23. Felt satisfied with your love life?                    | <input type="checkbox"/> |
| 24. Felt satisfied with your sex life?                     | <input type="checkbox"/> |

Due to your MS, during the past 4 weeks, have you...

|                                                                                                                                                 | Never<br>Not at all      | Rarely<br>A little       | Sometimes<br>Somewhat    | Often<br>A lot           | Always<br>Very much      | Not<br>applicable        |
|-------------------------------------------------------------------------------------------------------------------------------------------------|--------------------------|--------------------------|--------------------------|--------------------------|--------------------------|--------------------------|
| 25. Felt that your situation is unfair?                                                                                                         | <input type="checkbox"/> |
| 26. Felt bitter?                                                                                                                                | <input type="checkbox"/> |
| 27. Been upset by the stares of other people?                                                                                                   | <input type="checkbox"/> |
| 28. Been embarrassed when in public?                                                                                                            | <input type="checkbox"/> |
| 29. Been satisfied with the information on your disease or the treatment given by the doctors, nurses, psychologists... taking care of your MS? | <input type="checkbox"/> |
| 30. Felt understood by the doctors, nurses, psychologists... taking care of your MS?                                                            | <input type="checkbox"/> |
| 31. Been satisfied with your treatments?                                                                                                        | <input type="checkbox"/> |

Submit

**Quality of Life survey completed by participants following clinic-based test.**

## Patient Health Questionnaire (PHQ-9)

Note: for touch devices, please tap the boxes.

For each question, check the response that is closest to your feelings:

**Over the last 2 WEEKS, how often have you been bothered by any of the following problems?**

|                                                                                                                                                                              | Not at all               | Several days             | More than half the days  | Nearly every day         |
|------------------------------------------------------------------------------------------------------------------------------------------------------------------------------|--------------------------|--------------------------|--------------------------|--------------------------|
| 1. Little interest or pleasure in doing things?                                                                                                                              | <input type="checkbox"/> | <input type="checkbox"/> | <input type="checkbox"/> | <input type="checkbox"/> |
| 2. Feeling down, depressed, or hopeless?                                                                                                                                     | <input type="checkbox"/> | <input type="checkbox"/> | <input type="checkbox"/> | <input type="checkbox"/> |
| 3. Trouble falling or staying asleep, or sleeping too much?                                                                                                                  | <input type="checkbox"/> | <input type="checkbox"/> | <input type="checkbox"/> | <input type="checkbox"/> |
| 4. Feeling tired or having little energy?                                                                                                                                    | <input type="checkbox"/> | <input type="checkbox"/> | <input type="checkbox"/> | <input type="checkbox"/> |
| 5. Poor appetite or overeating?                                                                                                                                              | <input type="checkbox"/> | <input type="checkbox"/> | <input type="checkbox"/> | <input type="checkbox"/> |
| 6. Feeling bad about yourself - or that you are a failure or have let yourself or your family down?                                                                          | <input type="checkbox"/> | <input type="checkbox"/> | <input type="checkbox"/> | <input type="checkbox"/> |
| 7. Trouble concentrating on things, such as reading the newspaper or watching television?                                                                                    | <input type="checkbox"/> | <input type="checkbox"/> | <input type="checkbox"/> | <input type="checkbox"/> |
| 8. Moving or speaking so slowly that other people could have noticed. Or the opposite - being so fidgety or restless that you have been moving around a lot more than usual? | <input type="checkbox"/> | <input type="checkbox"/> | <input type="checkbox"/> | <input type="checkbox"/> |
| 9. Thoughts that you would be better off dead, or of hurting yourself in some way?                                                                                           | <input type="checkbox"/> | <input type="checkbox"/> | <input type="checkbox"/> | <input type="checkbox"/> |

**Depression survey completed by participants following clinic-based test.**

1:32 pm msreactor.com

## Penn State Worry Questionnaire (PSWQ-15)

Note: for touch devices, please tap the boxes.

For each question, check the response that is closest to your feelings:

For each of the following statements, please indicate how often that statement was characteristic of you DURING THE PAST WEEK.

|                                                                               | Never                    | Very rarely              | Rarely                   | Some times               | Often                    | Very often               | Almost always            |
|-------------------------------------------------------------------------------|--------------------------|--------------------------|--------------------------|--------------------------|--------------------------|--------------------------|--------------------------|
| 1. If I didn't have enough time to do everything, I didn't worry about it.    | <input type="checkbox"/> |
| 2. My worries overwhelmed me.                                                 | <input type="checkbox"/> |
| 3. I didn't tend to worry about things.                                       | <input type="checkbox"/> |
| 4. Many situations made me worry.                                             | <input type="checkbox"/> |
| 5. I knew I shouldn't have worried about things, but I just couldn't help it. | <input type="checkbox"/> |
| 6. When I was under pressure, I worried a lot.                                | <input type="checkbox"/> |
| 7. I was always worrying about something.                                     | <input type="checkbox"/> |
| 8. I found it easy to dismiss worrisome thoughts.                             | <input type="checkbox"/> |

1:32 pm msreactor.com

7. I was always worrying about something.

8. I found it easy to dismiss worrisome thoughts.

9. As soon as I finished one task, I started to worry about everything else that I had to do.

10. I did not worry about anything.

For each of the following statements, please indicate how often that statement was characteristic of you DURING THE PAST WEEK.

|                                                                                              | Never                    | Very rarely              | Rarely                   | Some times               | Often                    | Very often               | Almost always            |
|----------------------------------------------------------------------------------------------|--------------------------|--------------------------|--------------------------|--------------------------|--------------------------|--------------------------|--------------------------|
| 11. When there was nothing more I could do about a concern, I didn't worry about it anymore. | <input type="checkbox"/> |
| 12. I noticed that I had been worrying about things.                                         | <input type="checkbox"/> |
| 13. Once I started worrying, I couldn't stop.                                                | <input type="checkbox"/> |
| 14. I worried all the time.                                                                  | <input type="checkbox"/> |
| 15. I worried about projects until they were all done.                                       | <input type="checkbox"/> |

Thank you!

Anxiety survey completed by participants following clinic-based test.
